# Supplementary material for: Transient Receptor Potential Melastatin-3 (TRPM3) Mediates Nociceptive-Like Responses in Hydra vulgaris
Source: PLOS journal article supplement (doi:10.1371/journal.pone.0151386), 2016-03-14
Supplement: S1 (10.1371/journal.pone.0151386.s001) [file journal.pone.0151386.s001]

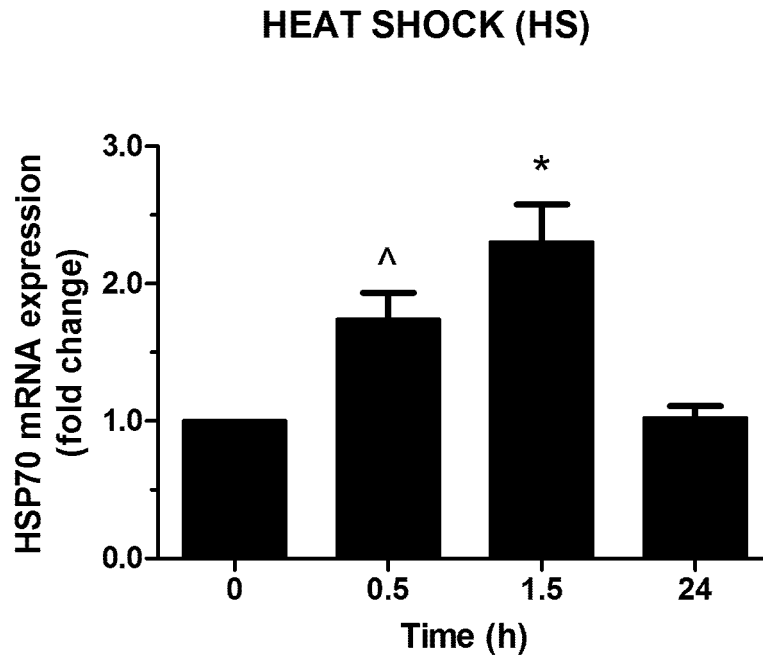

**S1 Fig. Effect of heat shock (HS; 34°C) on HSP70 mRNA expression in *H. vulgaris*.** HSP70 mRNA transcription after thermal stimulation was quantitatively analysed by comparing it to actin expression, as housekeeping gene. We tested up to 3 time points (expressed hours after test): 0.5, 1.5, and 24 h, and used T=0 as a control. After 0.5 h post-treatment, HSP70 mRNA quantity increased ~2 folds, compared to the control ( $p \leq 0.05$ ) and reached its maximum values of ~2.5 folds after 1.5 h ( $p \leq 0.01$ ), and it comes back to a physiological level at 24 h. \*  $p \leq 0.01$  vs 0 and ^  $p \leq 0.05$  vs 0.
